# Supplementary material
Source: Springer Nature journal article supplement (https://www.springermedizin.de/resource/supplementary/12990_2009_228_MOESM7_ESM.pdf/9612838)

—■— sham  
—●— MIA

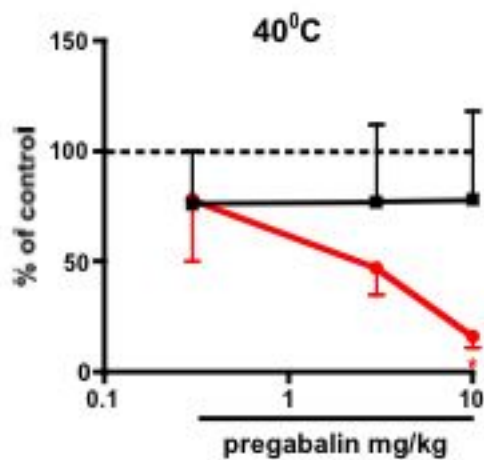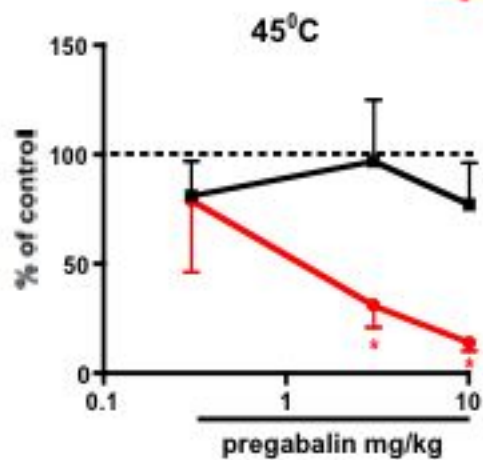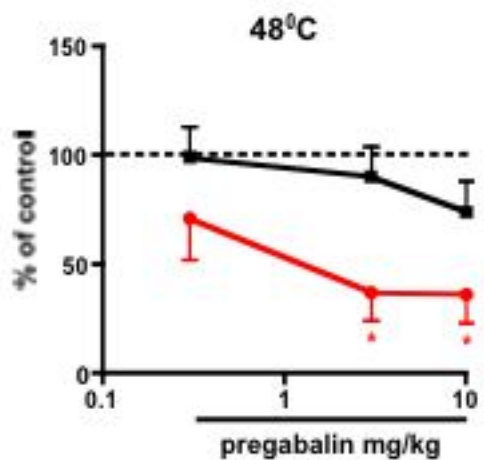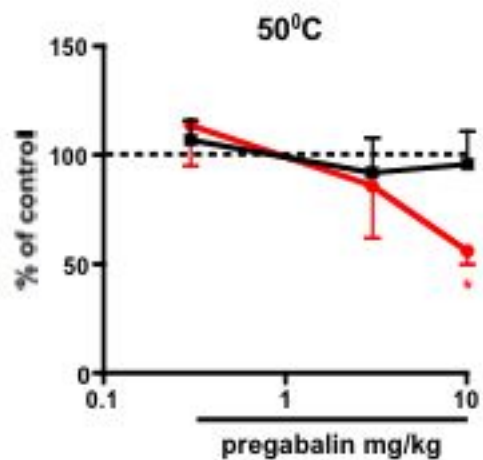

Supplement: MOESM7 [file 9612838]
